# Supplementary material for: Visual modelling supports the potential for prey detection by means of diurnal active photolocation in a small cryptobenthic fish
Source: PubMed Central journal article supplement (PMC6542814; doi:10.1038/s41598-019-44529-0), 2019-05-30
Supplement: 41598_2019_44529_MOESM1_ESM.pdf [file 41598_2019_44529_MOESM1_ESM.pdf]

1 Visual modelling supports the potential for prey detection by means of diurnal active  
2 photolocation in a small cryptobenthic fish

3

4 Pierre-Paul Bitton, Sebastian Alejandro Yun Christmann, Matteo Santon, Ulrike K. Harant, Nico  
5 K. Michiels

6

## 7 Supplementary Information

8

9 **Supplementary Table S1.** Symbols used in the equations to calculate the photon flux of the gammarid eye  
10 reaching the triplefin, with and without the contribution of the ocular spark

| <i>Symbol</i> | <i>Definition</i>                                                                                          |
|---------------|------------------------------------------------------------------------------------------------------------|
| $L$           | Photon radiance (photons $s^{-1} sr^{-1} m^{-2}$ )                                                         |
| $S$           | Blue ocular spark relative radiance (proportion of a PTFE white standard)                                  |
| $d$           | Distance between triplefin and gammarid eyes (m)                                                           |
| $r_t$         | Radius of triplefin pupil (m)                                                                              |
| $R_{ca}$      | Reflectance of gammarid eye ( <u>c</u> o <u>a</u> xial) (proportion of a PTFE white standard)              |
| $R_{nca}$     | Reflectance of gammarid eye ( <u>n</u> o <u>n-c</u> o <u>a</u> xial) (proportion of a PTFE white standard) |
| $\Phi$        | Photon flux coming from the gammarid eye reaching the triplefin pupil (photons $s^{-1}$ )                  |
| $\Omega$      | Solid angle of target as perceived by receiver (sr)                                                        |

11

12

## 13 Photon flux calculations

14 We calculated the photon flux of the gammarid eye reaching the triplefin pupil with and without the  
15 radiance of the ocular spark, assuming that the center of the triplefin pupil was at normal incidence to  
16 the center of the eye of the gammarid, i.e. the full area of the pupil of the triplefin is visible to the

17 gammarid and vice versa. We also assume the effect of absorbance and scattering of the water to be  
18 negligible since all energy transfers occur over distances shorter than 5 cm.

19

#### 20 *Photon flux without ocular spark*

21 The base photon radiance of the gammarid eye ( $L_0$ ) is a function of the sidewelling light field ( $L_{sw}$ ) and  
22 the reflectance of the gammarid eye with non-coaxial illumination:

$$23 \quad L_0 = L_{sw} \times R_{nca} \quad (1)$$

24

25 The photon flux reaching the retina of the triplefin without the ocular spark ( $\Phi_{ns}$ ) is the proportion the  
26 gammarid radiance multiplied by the solid angle of the gammarid eye ( $\Omega_{gam}$ ) and the area of the  
27 triplefin pupil ( $\pi r_t^2$ ):

$$28 \quad \Phi_{ns} = L_0 \times \Omega_{gam} \times \pi r_t^2 \quad (2)$$

29

#### 30 *Photon flux produced by ocular spark*

31 The photon radiance of the ocular spark ( $L_{os}$ ) is a determined by the downwelling light field ( $L_{dw}$ ), the  
32 catchment area of the lens, and the reflective properties of the iris chromatophores on which the light is  
33 focused. The effect of the lens and reflective properties of the chromatophores have only been  
34 measured together and are treated as a relative radiance value (S).

$$35 \quad L_{os} = L_{dw} \times S \quad (3)$$

36

37 The radiance of the gammarid eye ( $L_{gam}$ ) caused by the reflection of the ocular spark is estimated by  
38 multiplying the radiance of the ocular spark reaching the gammarid ( $L_{os}$ ) with the solid angle of the  
39 ocular spark ( $\Omega_{os}$ ) and the reflectance of the gammarid eye with illumination coaxial to the receiver  
40 ( $R_{ca}$ ). Because the properties of the gammarid eye are measured in relation to a diffuse white standard,  
41 the photon exitance from the gammarid eye is converted to photon radiance by dividing by  $\pi$   
42 steradians:

$$43 \quad L_{gam} = L_{os} \times \Omega_{os} \times R_{ca} \times \pi^{-1} \quad (4)$$

44

45 The photon flux generated by the ocular spark which reaches the triplefin retina ( $\Phi_{os}$ ) is determined as  
46 the proportion of the ocular spark generated gammarid eye radiance (Eq. 4) multiplied by the perceived  
47 size of the gammarid eye, in steradians, and the area of the triplefin pupil:

48 
$$\Phi_{os} = L_{os} \times \Omega_{os} \times R_{ca} \times \pi^{-1} \times \Omega_{gam} \times \pi r_t^2$$
 (5)

49

50 The total photon flux reaching the retina of the triplefin with the ocular spark is then the sum of  
51 equations (2) and (5).

52 A similar calculation was used for the effect of the ocular spark on the illumination of the  
53 gammarid body. In these calculations we estimated the photon flux reaching the retina of the triplefin  
54 with and without the contribution of the ocular spark, using the same solid angles. In contrast to  
55 calculations with the gammarid eye, we used the same body reflectance values for the coaxially and  
56 non-coaxially illuminated scenarios. The photon exitance from the body, both with and without the  
57 contribution of the ocular spark was determined as the proportion of light that was reflected by the  
58 body and the proportion of light that was transmitted through the body, reflected by the substrate, and  
59 transmitted again through the body.

60 For all calculations, the solid angle of the gammarid eye from the perspective of the triplefin  
61 pupil ( $\Omega_{gam}$ ), and the solid angle of the ocular spark from the perspective of the gammarid eye ( $\Omega_{os}$ ),  
62 in steradians, were estimated by Monte Carlo simulation (35). The triplefin pupil, gammarid eye, and  
63 ocular spark were treated as disks of zero thickness. The pupil and gammarid eye were always  
64 positioned centered and at normal incidence to one another, and the ocular spark positioned at the  
65 edge of the iris (displacement = 1.09 mm) in the same plane and normal vector as the triplefin pupil.  
66 Because we estimate that the triplefin can focus on objects minimally at 7 mm and that average  
67 gammarid eye becomes a point source beyond ~48 mm, we determined the solid angles for distances  
68 between 5 mm and 45 mm. The calculations were based on 1E09 photon packets emitted from the  
69 source; these generated solid angle estimates with 99.9% confidence intervals with errors ranging from  
70 1.2 % of the solid angle value at 5 mm to 10.6 % at 45 mm.

71

## 72 Exploration of parameter space

73 To explore the parameter space of our interaction between triplefins and gammarids, we varied the  
74 parameters known to have the most influence on the calculated contrasts. To allow comparison and  
75 visualization of the results, we chose to model two continuous parameters: the ocular spark radius and  
76 the ocular spark relative radiance, and two categorical parameters: the relationship between the coaxial  
77 and non-coaxial reflectance of the gammarid eyes, and the relationship between the downwelling and  
78 sidewelling light field.

79           The parameter 'ocular spark radius' ranged from 0.09 mm to 0.25 mm (based on actual  
80 measurements ranging from 0.10 mm to 0.24 mm) in 41 intervals of equal increments (0.004 mm). The  
81 range values for the parameter 'ocular spark relative radiance' was produced by first taking the mean  
82 value of all measurements at each wavelength (binned in 1 nm interval) and varying the area under the  
83 curve between the measured range of 63 % to 209 %. To produce square matrices of results, the value  
84 range was also divided in 41 intervals of equal increments.

85           The relationship between the coaxial and non-coaxial reflectance of gammarid eyes was not  
86 correlated in the samples measured. To explore the influence of this parameter we calculated the  
87 average difference between the coaxial and non-coaxial eye reflectance measurement obtained from  
88 each gammarid, calculated at each wavelength (binned in 1 nm interval), and varied the area under the  
89 curve to represent the minimum value observed (10.1 %), the average value (24.4%), and the maximum  
90 value observed (37.25 %).

91           We included four measures of the relationship between the downwelling and sidewelling light  
92 fields: no shade, weakly shaded, average shade, and strongly shaded. The relationship between the  
93 downwelling and unshaded sidewelling spectral light profile was obtained by taking their ratio at several  
94 measured locations. The three categories of shaded sidewelling light were obtained by calculating the  
95 average difference between the downwelling and shaded sidewelling light fields at each measurement  
96 station, and varying the area under the curve to represent the minimum value observed (ratio DW/SW =  
97 8.65), the average value (ratio = 16.62), and the maximum value observed (ratio = 26.63). These  
98 conversion vectors were then applied to the downwelling light field obtained at 10 m depth.

99

Difference between coaxial and non-coaxial illumination

Large

Average

Small

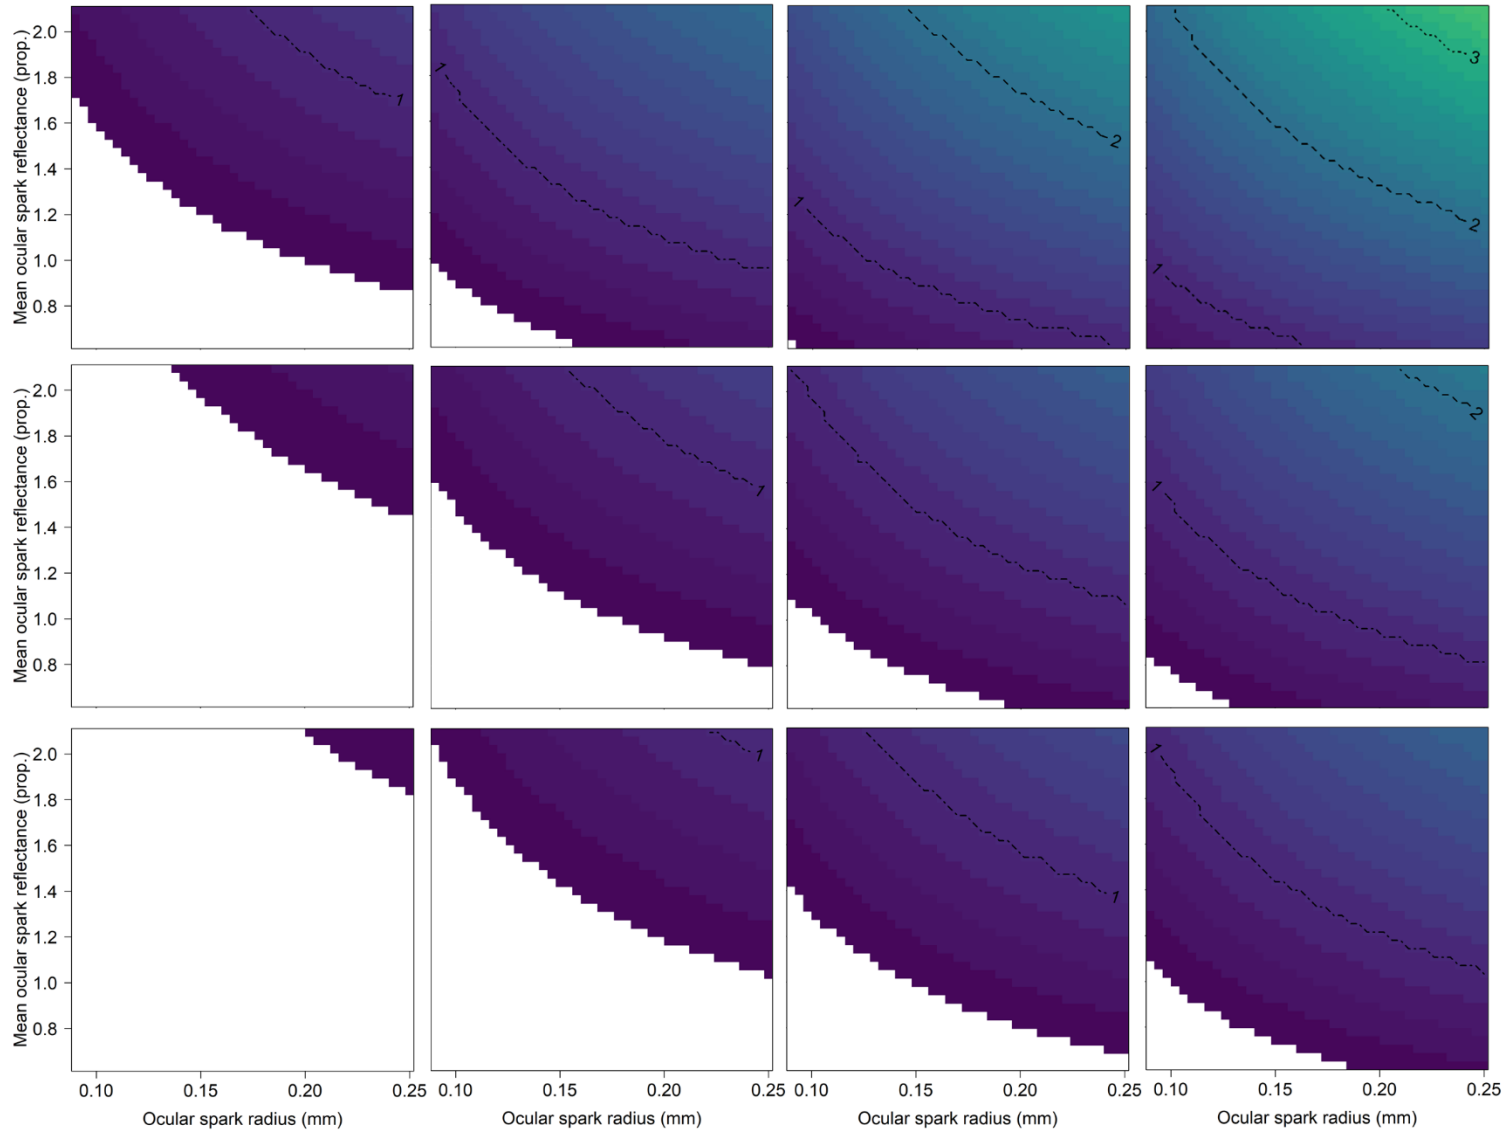

101 **Supplementary Figure S1.** Maximum detectable distances of ocular spark reflectance from the eye of gammarids  
102 under varying scenarios (Weber fraction = 0.05). Top, middle, and bottom row were obtained by varying the  
103 relationship between the reflectance of gammarid eyes with coaxial epi-illumination and at 45° from normal.  
104 Vertical rows were obtained by varying the amount of shade on which prey items rests. Conditions in which active  
105 photolocation would not assist in gammarid detection are in white.  
106

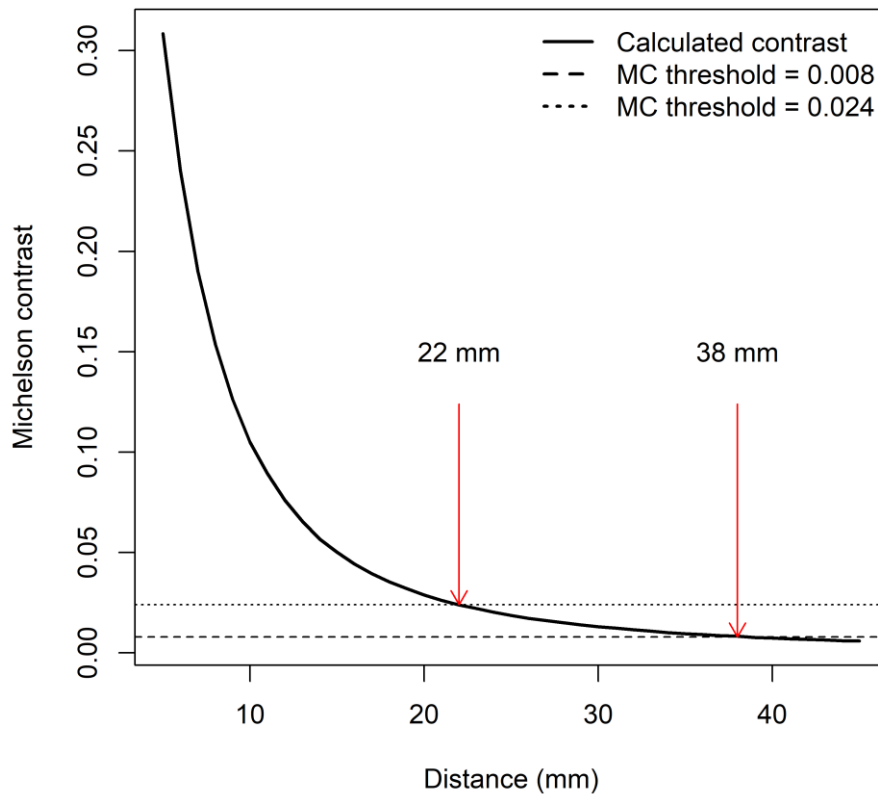

107  
108 **Supplementary Figure S2.** Example extrapolation of the maximum distance at which reflections in the gammarid  
109 eye caused by ocular spark radiance are discernable. The Michelson contrast (achromatic contrast) is the perceived  
110 difference in photon flux from the gammarid eye with and without ocular spark contribution. The maximum  
111 discernable distance is defined as the distance at which the Michelson contrast is equal to an optimistic value of  
112 0.008, or a conservative value of 0.024.
